# Supplementary material
Source: PubMed Central journal article supplement (PMC7654970)

Supplemental Figure 1:

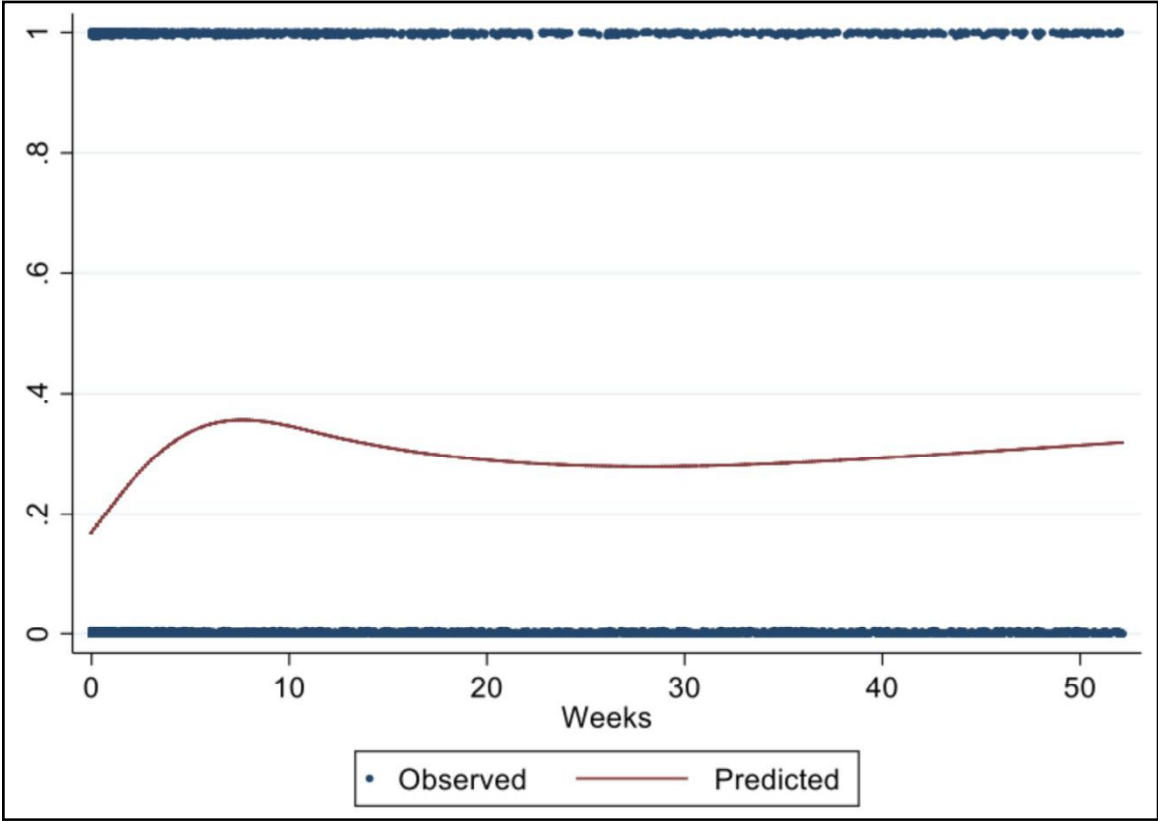

Best-fit curve of the binary distribution of post-operative GFR values over time throughout the first post-operative year. A value of “1” corresponds to a decline to a GFR value <45. A value of “0” corresponds to a patient in whom GFR did not fall to <45 at that time.

## Supplemental Figure 2: Nomogram (full model)

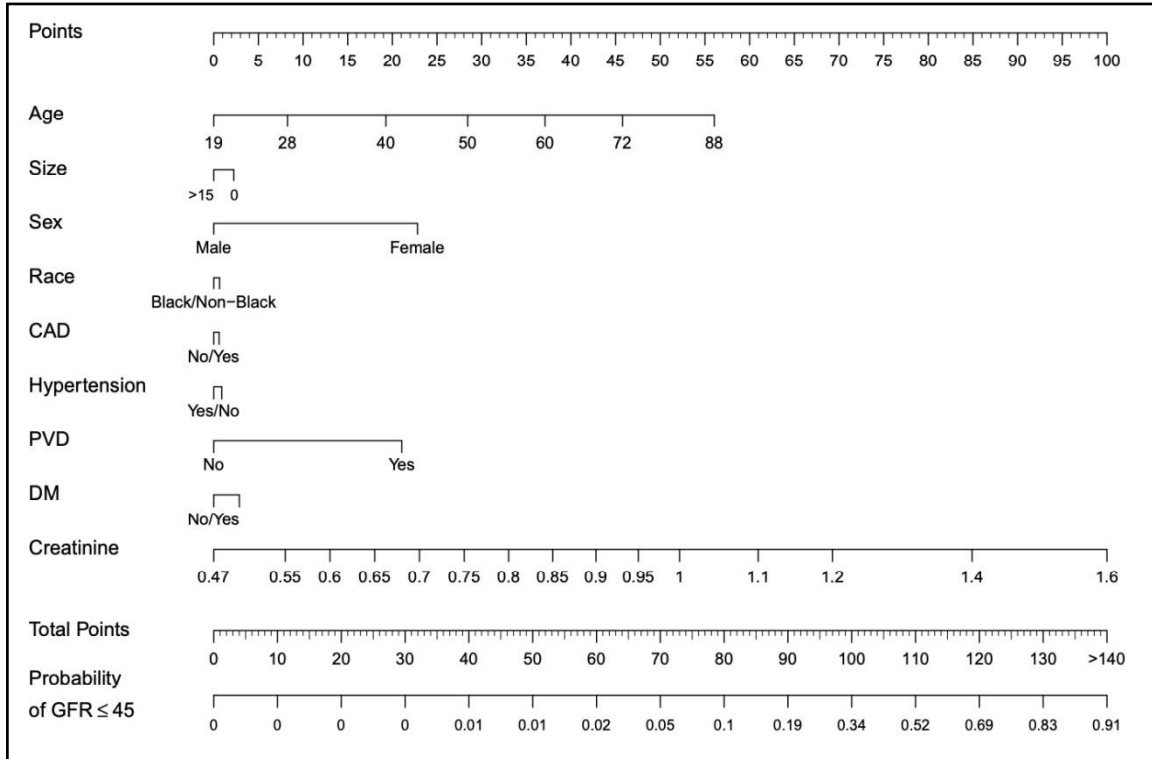

Nomogram for the prediction of baseline eGFR reduction to  $\leq 45$  within one year of surgery, based on the full multivariable model. See Figure 1 for instruction on use of nomogram.

**Supplemental Figure 3: Area under the curve of the full model. The 20-fold cross validated area under the ROC curve was 0.775, 95% Confidence Interval 0.734-0.817.**

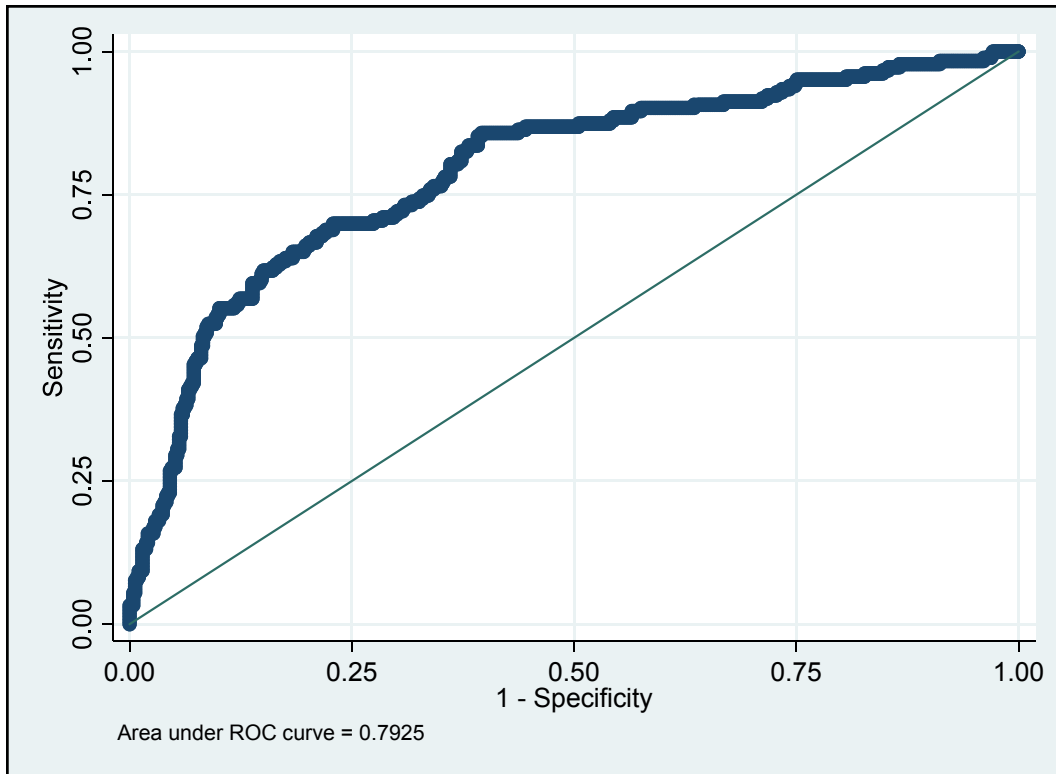

**Supplemental Figure 4: Calibration curve (full model)**

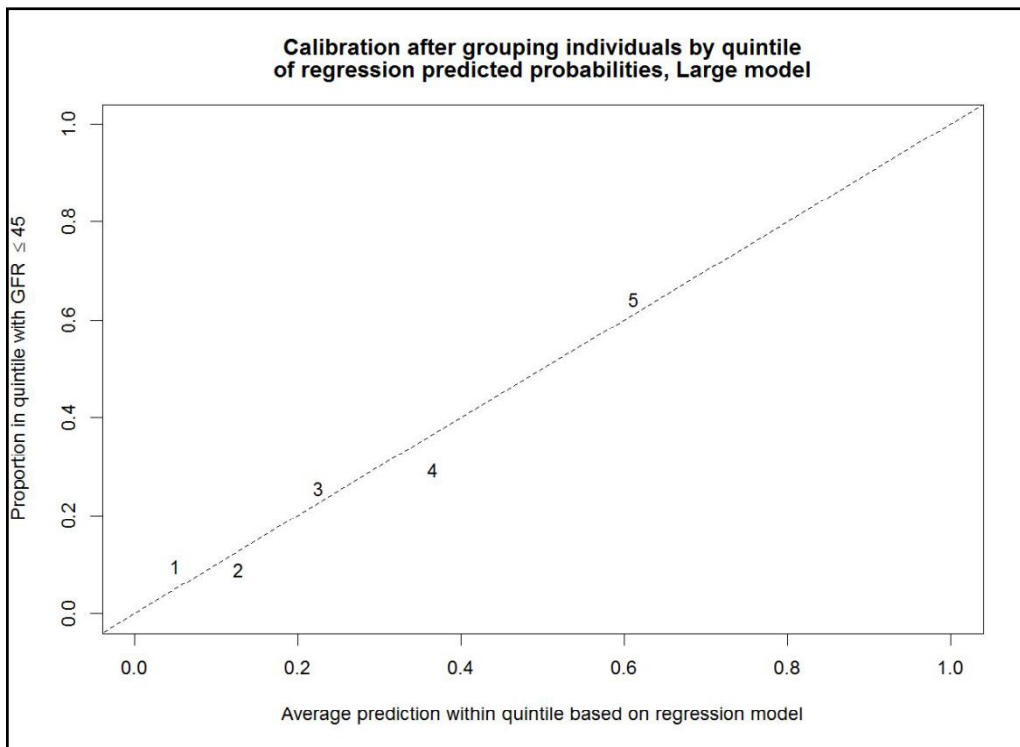

Supplement: NIHMS1629213-supplement-1.pdf [file NIHMS1629213-supplement-1.pdf]
